# Supplementary material for: Optic disc shape in patients with long-lasting unilateral esotropia and exotropia
Source: BMC Ophthalmol. 2019 Aug 16;19:185. doi: 10.1186/s12886-019-1197-8 (PMC6697976; doi:10.1186/s12886-019-1197-8)
Supplement: Supplementary file 1 — Parameters on exotropic and esotropic eyes in all participants. (XLS 80 kb) [file 12886_2019_1197_MOESM1_ESM.xls]

## Sheet: strabismus
	Exotropia	Age	Eye	Ovality Index	Squinting eye 1	Refractive error	Beta/Gamma PPA	Axial length	Angle of deviation 33cm
1	1	21-25	OD	0.891	0	0.25	0	22.3	-100
2			OS	0.889	1	0.5	0	22.2	-100
3	2	31-35	OD	0.867	0	-0.75	0	22.9	-100
4			OS	0.897	1	0	1	22.15	-100
5	3	41-45	OD	1	1	-5.25	1	26.04	-110
6			OS	1	0	-3	0	25.01	-110
7	4	6--10	OD	0.899	0	2.375	0	21.3	-95
8			OS	0.921	1	2.5	0	21.3	-95
9	5	35-40	OD	0.778	0	-0.375	0	23.8	-110
10			OS	0.778	1	-0.5	1	23.9	-110
11	6	35-40	OD	0.889	1	-1.375	0	23.24	-140
12			OS	0.833	0	-1.25	0	23.2	-140
13	7	6--10	OD	0.978	1	1.375	1		-110
14			OS	1	0	1.75	1		-110
15	8	6--10	OD	0.85	0	0.25	0		-105
16			OS	0.722	1	-0.25	1		-105
17	9	16-20	OD	0.72	1	-1.5	1	24.3	-90
18			OS	0.84	0	-1.5	0	24.38	-90
19	10	11--15	OD	0.833	0	-2.75	0	25.11	-90
20			OS	0.944	1	-4.5	0	26.23	-90
21	11	21-25	OD	0.87	0	-1.5	0	23.83	-120
22			OS	0.833	1	-2.75	1	24.45	-120
23	12	16-20	OD	0.875	0	0	0	23.3	-100
24			OS	0.848	1	0	0	23.4	-100
25	13	45-50	OD	0.811	1	-0.125	0	24.01	-100
26			OS	0.846	0	-0.375	1	24.16	-100
27	14	36-40	OD	0.895	0	-0.25	0	22.61	-140
28			OS	0.882	1	-5.875	1	27.92	-140
29	16	46-50	OD	0.895	1	-2	1	23.27	-80
30			OS	0.868	0	-2.25	0	23.23	-80
31	17	46-50	OD	0.783	1	0	0		-140
32			OS	0.711	0	-1.25	0		-140
33	18	11--15	OD	0.7	1	-2.75	1	24.85	-110
34			OS	0.789	0	-3.25	1	25.09	-110
35	19	66-70	OD	0.905	1	0	0	22.05	-100
36			OS	0.889	0	0.5	0	21.84	-100
37	21	21-25	OD	0.714	1	-1.5	1		-95
38			OS	0.857	0	0.125	0		-95
39	22	16-20	OD	0.921	0	0	0	22.4	-80
40			OS	0.778	1	0	1	22.5	-80
41	23	11--15	OD	0.894	0	0.75	0		-80
42			OS	0.913	1	0.5	0		-80
43	24	6--10	OD	0.78	0	-1.25	1	23.6	-62
44			OS	0.809	1	-2	1	23.87	-62
45	25	11--15	OD	0.87	1	-6.75	1	24.91	-120
46			OS	0.8	0	-7.85	1	25.21	-120
47	26	56-60	OD	0.96	0	-0.5	1	23.71	-80
48			OS	1	1	-0.5	1	24.01	-80
49	27	26-30	OD	0.909	1	-0.5	0	22.83	-95
50			OS	0.887	0	0	1	22.8	-95
51	28	31-35	OD	0.86	1	-1.75	1	23.93	-120
52			OS	0.86	0	-1.25	1	23.63	-120
53	29	6--10	OD	0.89	1	-9.25	1	26.89	-50
54			OS	0.88	0	-8.25	1	26.74	-50
55	30	6--10	OD	0.948	1	-3.5	1	24.82	-80
56			OS	0.855	0	-3.875	1	25.15	-80
57	31	6--10	OD	0.811	0	0	0	24.23	-80
58			OS	0.868	1	0	1	24.23	80
59	32	11--15	OD	0.851	0	0	0	21.99	-95
60			OS	0.857	1	-0.5	0	21.59	-95
61	33	26-30	OD	0.708	1	-2.75	1	24.37	-80
62			OS	0.792	0	-1.5	1	23.99	-80
63	34	26-30	OD	0.739	0	-8	1	27.91	-95
64			OS	0.783	1	-8	1	27.67	-95
65	35	56-60	OD	0.9	0	-0.75	1	23.89	-110
66			OS	0.88	1	0.625	1	22.94	-110
67	36	26-30	OD	1	0	0	0	22.71	-110
68			OS	0.98	1	0	0	22.79	-110
69	37	76-80	OD	0.783	0	-1	1	24.25	-100
70			OD	0.737	1	-2	1	24.47	-120
	Esotropia
1	1	26-30	OD	1	1	-4.75	0	25.14	110
2			OS	1	0	-7.5	0	26.54	110
3	2	31-35	OD	0.75	1	-9	1	27.62	140
4			OS	0.878	0	-7	1	27.02	140
5	3	21-25	OD	0.827	0	1.875	0	22.01	110
6			OS	0.813	1	-1.75	0	23.34	110
9	5	11--15	OD	0.91	1	0	0	23.37	80
10			OS	0.89	0	-4.75	0	25.34	80
11	6	6--10	OD	0.857	1	6.75	0	21.21	30
12			OS	0.938	0	6.625	0	21.27	30
13	7	6--10	OD	0.9	0	2.75	0		105
14			OS	0.9	1	2.5	0		105
15	8	36-40	OD	0.889	1	2.75	1	21.69	90
16			OS	0.889	0	1.75	1	22.01	90
17	9	11--15	OD	0.765	1	-3.125	1	24.85	50
18			OS	1	0	1	0	22.77	50
19	10	6--10	OD	0.789	0	1.5	0	22.09	110
20			OS	0.778	1	3.75	0	21.36	110
21	11	6--10	OD	0.875	0	5.5	0	21.37	80
22			OS	0.778	1	6.25	0	21.29	80
23	12	6--10	OD	0.889	1	5.375	0		110
24			OS	0.947	0	5.375	0		110
25	14	16-20	OD	0.888	0	3.25	0	21.72	140
26			OS	0.875	1	2.75	0	21.93	140
27	15	36-40	OD	0.864	0	-2.25	1	26.03	90
28			OS	0.947	1	-2.5	1	25.89	90
29	16	11--15	OD	0.929	1	0.375	0	23.03	84
30			OS	0.738	0	0	0	22.94	0
31	17	6--10	OD	0.769	0	5.625	1		80
32			OS	0.789	1	5	1		80
33	18	21-25	OD	0.857	0	-6.375	1	27.25	50
34			OS	0.889	1	-5.875	1	26.83	50
35	19	6--10	OD	0.889	0	3.625	0		105
36			OS	1	1	5.125	0		105
37	20	16-20	OD	0.743	1	-3	1	24.79	80
38			OS	0.847	0	-0.25	1	24.03	80
39	21	61-65	OD	0.762	1	-1	1	23.88	100
40			OS	0.75	0	-1.5	1	24	60
41	22	61-65	OD	0.89	1	0.75	1	21.9	110
42			OS	0.86	0	0.5	1	22.02	60
43	23	11--15	OD	1	1	-2	1	24.07	50
44			OS	0.706	0	-2	1	24.1	50
45	24	6--10	OD	1	0	0.25	0		130
46			OS	0.9	1	0.75	0		130
47	25	1--5	OD	0.91	0	2.75	0		90
48			OS	0.95	1	2.75	0		90
49	26	26-30	OD	0.918	0	1.125	0	22.7	36
50			OS	0.913	1	2.125	0	22.3	36
51	27	11--15	OD	0.939	1	5.5	0	22.77	85
52			OS	0.885	0	3.75	0	23.3	85
53	28	26-30	OD	0.9	0	-2.5	0	24.56	30
54			OS	0.92	1	-2.75	1	24.61	30
55	29	21-25	OD	0.92	1	-6.5	1	26.18	130
56			OS	0.96	0	-5.5	1	25.6	130
57	30	26-30	OD	0.96	0	0	1	23.47	20
58			OS	0.893	1	0	1	23.52	25
59	31	61-65	OD	0.792	1	1.25	0	22.77	140
60			OS	0.875	0	1.75	0	22.48	140
61	32	51-55	OD	0.913	1	0.5	0	23.02	140
62			OS	0.955	0	0.5	0	23.04	140
63	33	31-35	OD	0.808	0	-3.5	1	25.38	30
64			OS	0.852	1	-3.5	1	25.6	30
65	34	16-20	OD	0.897	1	-6.75	1	27.33	85
66			OS	0.683	0	-7	1	27.2	85
67	35	1--5	OD	0.855	1	0.375	0	21.85	110
68			OS	0.819	0	0.5	0	21.96	110
69	36	6--10	OD	0.96	1	0.875	0	22.71	78
70			OS	0.86	0	0.75	0	22.71	90
71	38	56-60	OD	0.75	0	1	1	22.48	97
72			OS	0.85	1	1	1	22.53	113
